# Supplementary material
Source: PubMed Central journal article supplement (PMC2736774)
Supplement: ASN.2008111205_1.pdf [file ASN.2008111205_1.pdf]

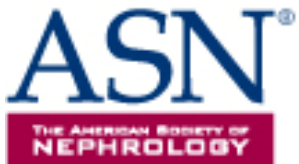

1725 I Street NW • Suite 510 • Washington, DC 20006  
Tel 202-659-0599 • Fax 202-659-0709 • [www.asn-online.org](http://www.asn-online.org)

## **EMBARGOED FOR RELEASE UNTIL 5:00 PM ET ON JULY 16, 2009**

### **Contacts:**

Shari Leventhal, American Society of Nephrology: [sleventhal@asn-online.org](mailto:sleventhal@asn-online.org), 202-416-0658

William Mach, Barts and The London NHS Trust: [William.Mach@bartsandthelondon.nhs.uk](mailto:William.Mach@bartsandthelondon.nhs.uk)

## **BAKING SODA: FOR COOKING, CLEANING, AND KIDNEY HEALTH?**

*Sodium Bicarbonate Appears to Slow Progression of Chronic Kidney Disease*

**Washington, DC (Thursday, July 9, 2009)** — A daily dose of sodium bicarbonate—baking soda, already used for baking, cleaning, acid indigestion, sunburn, and more—slows the decline of kidney function in some patients with advanced chronic kidney disease (CKD), reports an upcoming study in the *Journal of the American Society of Nephrology* (JASN). "This cheap and simple strategy also improves patients' nutritional status, and has the potential of translating into significant economic, quality of life, and clinical outcome benefits," comments Magdi Yaqoob, MD (Royal London Hospital).

The study included 134 patients with advanced CKD and low bicarbonate levels, also called metabolic acidosis. One group received a small daily dose of sodium bicarbonate in tablet form, in addition to their usual care. For this group, the rate of decline in kidney function was greatly reduced—about two-thirds slower than in patients. "In fact, in patients taking sodium bicarbonate, the rate of decline in kidney function was similar to the normal age-related decline," says Yaqoob.

Rapid progression of kidney disease occurred in just nine percent of patients taking sodium bicarbonate, compared to 45 percent of the other group. Patients taking sodium bicarbonate were also less likely to develop end-stage renal disease (ESRD) requiring dialysis.

Patients taking sodium bicarbonate also had improvement in several measures of nutrition. Although their sodium levels went up, this didn't lead to any problems with increased blood pressure.

Low bicarbonate levels are common in patients with CKD and can lead to a wide range of other problems. "This is the first randomized controlled study of its kind," says Yaqoob. "A simple remedy like sodium bicarbonate (baking soda), when used appropriately, can be very effective."

**MORE**

The researchers note some important limitations of their study—there was no placebo group and the researchers were aware of which patients were receiving sodium bicarbonate. "Our results will need validation in a multicenter study," says Yaqoob.

Other authors were Ione de Brito-Ashurst, RD, Mira Varaganum, PhD, and Martin J. Raftery, MD (William Harvey Research Institute and Barts and the London NHS Trust, London). The authors reported no financial disclosures.

The study entitled, Bicarbonate Supplementation Slows Progression of CKD and Improves Nutritional Status will appear online at <http://jasn.asnjournals.org/> on July 16, 2009, doi 10.1681/ASN.2008111205.

The American Society of Nephrology (ASN) does not offer medical advice. All content in ASN publications is for informational purposes only, and is not intended to cover all possible uses, directions, precautions, drug interactions, or adverse effects. This content should not be used during a medical emergency or for the diagnosis or treatment of any medical condition. Please consult your doctor or other qualified health care provider if you have any questions about a medical condition, or before taking any drug, changing your diet or commencing or discontinuing any course of treatment. Do not ignore or delay obtaining professional medical advice because of information accessed through ASN. Call 911 or your doctor for all medical emergencies.

Founded in 1966, ASN is the world's largest professional society devoted to the study of kidney disease. Comprised of 11,000 physicians and scientists, ASN continues to promote expert patient care, to advance medical research, and to educate the renal community. ASN also informs policymakers about issues of importance to kidney doctors and their patients. ASN funds research, and through its world-renowned meetings and first-class publications, disseminates information and educational tools that empower physicians.

###
